# Supplementary material for: OGG1 Mutations and Risk of Female Breast Cancer: Meta-Analysis and Experimental Data
Source: Hindawi journal article supplement (doi:10.1155/2015/690878), 2015-01-01
Supplement: f1 [file 690878.f1.pdf]

**Supplementary Table 1: Demographic characteristics of patients and controls in present case-control study.**

| Variables                                                      | Patients (N=530)    | Control (N=395)      | OR (95%CI)          | p-value     |
|----------------------------------------------------------------|---------------------|----------------------|---------------------|-------------|
| <b>1. Age (years)</b>                                          |                     |                      |                     |             |
| <b>Mean (<math>\pm</math>S.D)</b>                              | 46.4 ( $\pm$ 11.59) | 42.80 ( $\pm$ 12.96) |                     |             |
| <b><math>\leq</math>40</b>                                     | 188 (35.47%)        | 163 (41.30%)         | 0.78 (0.6 to 1.0)   | <0.07       |
| <b>&gt;40</b>                                                  | 342 (64.53%)        | 232 (58.70%)         |                     |             |
| <b>2. Family History</b>                                       |                     |                      |                     |             |
| <b>Yes</b>                                                     | 98 (18.49%)         | 19 (4.81%)           | 4.49 (2.69 to 7.47) | <0.0001     |
| <b>No</b>                                                      | 432 (81.51%)        | 376 (95.19%)         |                     |             |
| <b>3. Age at menarche (years)</b>                              |                     |                      |                     |             |
| <b>&lt;13</b>                                                  | 133 (25.09%)        | 98 (24.81%)          | 1.01 (0.75 to 1.37) | <0.9        |
| <b><math>\geq</math>13</b>                                     | 397 (74.91%)        | 297 (75.19%)         |                     |             |
| <b>4. Menopausal Status</b>                                    |                     |                      |                     |             |
| <b>Pre-menopausal</b>                                          | 288 (54.34%)        | 222 (56.20%)         | 0.92 (0.71 to 1.20) | <0.5        |
| <b>Post-menopausal</b>                                         | 242 (45.66%)        | 173 (43.80%)         |                     |             |
| <b>5. Age at Menopause</b>                                     |                     |                      |                     |             |
| <b><math>\leq</math>50 years</b>                               | 186 (35.09%)        | 75 (18.99%)          | 4.34 (2.84 to 6.63) | <0.0001     |
| <b>&gt;50 years</b>                                            | 56 (10.57%)         | 98 (24.81%)          |                     |             |
| <b>6. Parity (Married Patients 487) (Married Controls 326)</b> |                     |                      |                     |             |
| <b>Nulliparity (P0)</b>                                        | 63 (13%)            | 49 (15.01%)          |                     | 0.36        |
| <b>Uni/bi-parity (P1-2)</b>                                    | 129 (26%)           | 81 (24.85%)          |                     |             |
| <b>Multiparity (P3-n)</b>                                      | 295 (61%)           | 196 (60.12%)         |                     |             |
| <b>7. Age at First Birth (total=424) (total=277)</b>           |                     |                      |                     |             |
| <b>&lt; 25 years</b>                                           | 299 (70.52%)        | 179 (64.62%)         |                     | 0.1         |
| <b><math>\geq</math> 25 years</b>                              | 125 (29.48%)        | 98 (35.38%)          |                     |             |
| <b>9. Smoking History (cigarette, Pan, Chhalia, Naswar, )</b>  |                     |                      |                     |             |
| <b>Non-Smokers</b>                                             | 443 (84%)           | 351(88.86%)          |                     | <b>0.03</b> |
| <b>Smokers</b>                                                 | 87(16%)             | 44 (11.14%)          |                     |             |

\*OR, odds ratio; CI, confidence interval. ORs for logistic regression analysis.

p>0.05, by  $\chi^2$  -test for trend

**Supplementary Table 2: Histopathological characteristics of cancer patients in present case-control study.**

|                                           |                             |                         |                             |                 |
|-------------------------------------------|-----------------------------|-------------------------|-----------------------------|-----------------|
| <b>1. Site of breast tumor (N= 530)</b>   |                             |                         |                             |                 |
| <b>Variables</b>                          | <b>Bilateral</b>            | <b>Unilateral Right</b> | <b>Unilateral Left</b>      |                 |
| <b>No (%age)</b>                          | 26 (4.9%)                   | 231(43.6%)              | 273(51.5%)                  |                 |
| <b>2. Tumor Type (N=333)</b>              |                             |                         |                             |                 |
| <b>Variables</b>                          | <b>DCI</b>                  | <b>IDC</b>              | <b>ILC</b>                  |                 |
| <b>No (%age)</b>                          | 78 (23.42%)                 | 216 (64.86%)            | 39 (11.71%)                 |                 |
| <b>3. Tumor Grade (N= 447)</b>            |                             |                         |                             |                 |
| <b>Variables</b>                          | <b>Grade I</b>              | <b>Grade II</b>         | <b>Grade III</b>            | <b>Grade IV</b> |
| <b>No (%age)</b>                          | 110 (24.61%)                | 212 (47.43%)            | 112 (25.05%)                | 13 (2.90%)      |
| <b>4. ER Status (N=322)</b>               |                             |                         |                             |                 |
| <b>Variables</b>                          | <b>ER-ve</b>                |                         | <b>ER+ve</b>                |                 |
| <b>No (%age)</b>                          | 209 (64.9%)                 |                         | 113 (35.1%)                 |                 |
| <b>5. PR Status (N=326)</b>               |                             |                         |                             |                 |
| <b>Variables</b>                          | <b>PR-ve</b>                |                         | <b>PR+ve</b>                |                 |
| <b>No (%age)</b>                          | 205 (62.88%)                |                         | 121(37.12%)                 |                 |
| <b>6. HER-2/<i>neu</i> status (N=285)</b> |                             |                         |                             |                 |
| <b>Variables</b>                          | <b>HER-2/<i>neu</i> -ve</b> |                         | <b>HER-2/<i>neu</i> +ve</b> |                 |
| <b>No (%age)</b>                          | 164 (57.54%)                |                         | 121 (42.46%)                |                 |

DCI, Ductal Carcinoma in Situ; IDC, Invasive Ductal Carcinoma; ILC, Invasive Lobular Carcinoma;  
ER, Estrogen Receptor; PR, Progesterone Receptor; HER-2/*neu*, Human Epidermal growth factor Receptor 2

**Supplementary Table: 3 Mutations observed in the OGG1 gene in breast cancer patients**

| MUTATION/ EXON                                    | Change at Genomic DNA Chr3(GRCh37) | Change at cDNA Level NM_002542.5 | Change at Protein Level/ possible consequence                                           |
|---------------------------------------------------|------------------------------------|----------------------------------|-----------------------------------------------------------------------------------------|
| <b>Insertion/ Intron 1</b>                        | g.9792260ins_T                     | c.137+153dupT                    |                                                                                         |
| <b>Substitution/ Intron 3</b><br>(rs55846930)     | g.9793680G>A                       | c.565+47G>A                      |                                                                                         |
| <b>Substitution/ Intron 3</b>                     | g.9793748G>A                       | c.565+115G>A                     |                                                                                         |
| <b>Substitution/ Intron 5</b>                     | g.9798336T>G                       | c.898+31T>G                      |                                                                                         |
| <b>Substitution/Intron 5</b>                      | g.9798349T>A                       | c.898+44T>A                      |                                                                                         |
| <b>Splice site deletion/ Intron 1</b>             | g.9792109del T                     | c.137+2delT                      | Variation in donor splice site 2 bps upstream & skip of exon 1 is very likely           |
| <b>Splice site substitution / Intron 5</b>        | g.9798307T>G                       | c.898+2T>G                       | Variation in donor splice site 2 bps upstream & skip of exon 5 is very likely           |
| <b>Splice site substitution / Intron 6</b>        | g.9798502T>G                       | c.948+2T>G                       | Variation in donor splice site 2 bps upstream & skip of exon 6 is very likely           |
| <b>Splice site substitution / Intron 7a</b>       | g.9800972T>G                       | c.1048+2T>G<br>NM_016828.2       | Variation in donor splice site 2 bps upstream & skip of exon 7a is very likely          |
| <b>Substitution/ 3' UTR</b>                       | g.9798848G>A                       | c.*14G>A                         |                                                                                         |
| <b>Substitution/ 3' UTR</b>                       | g.9798896T>C                       | c.*62T>C                         |                                                                                         |
| <b>Missense/ Exon 3</b>                           | g.9793544T>G                       | c.476T>G<br>NM_016821.2          | <b>p.Val159Gly</b><br>variant in protein domains HhH-GPD & 8-oxoguanine DNA-glycosylase |
| <b>Missense/ Exon 4</b><br>(TMP_ESP_3_9796483 )   | g.9796483G>A                       | c.661G>A<br>NM_016821.2          | <b>p.Gly221Arg</b><br>variant in protein domains HhH-GPD & 8-oxoguanine DNA-glycosylase |
| <b>Missense/ Exon 6d</b><br>(rs1052133)(CM993185) | g.9798773C>G                       | c.977C>G                         | <b>p.Ser326Cys</b><br>variant is in protein domain: 8-oxoguanine DNA-glycosylase        |
| <b>Termination/ Exon 8</b>                        | g.9807669G>A                       | c.1125G>A<br>NM_016821.2         | <b>p.Trp375STOP</b><br>Premature termination resulted in truncated protein              |

rs = reference single nucleotide polymorphism (SNP) identifier; Nomenclature of sequence variants follows the recommendations by the Human Genome Variation Society (HGVS, <http://www.hgvs.org/mutnomen> Classification of novel sequence variants. HhH-GPD= hallmark helix-hairpin-helix and Gly/Pro rich loop domain.
